# Supplementary material for: Seed morphology and sculpture of invasive Impatiens capensis Meerb. from different habitats
Source: PeerJ. 2020 Nov 18;8:e10156. doi: 10.7717/peerj.10156 (PMC7680054; doi:10.7717/peerj.10156)
Supplement: Supplemental Information 1 [file peerj-08-10156-s001.xlsx]

## Sheet: Arkusz1
	Length	Width	Circuit	Area		ZG
	4.19	1.98	9.85	5.84	A1	Podgrodzie
	4.17	2.34	9.82	6.14	A2	Podgrodzie
	4.02	2.18	10.11	6.68	A3	Podgrodzie
	4.28	2.27	10.09	6.84	A4	Podgrodzie
	4.15	2.29	10.08	6.53	A5	Podgrodzie
	3.99	2.33	9.94	6.44	A6	Podgrodzie
	3.72	1.53	9.13	4.72	A7	Podgrodzie
	4.37	2.82	11.24	9.03	A8	Podgrodzie
	4.12	1.97	9.62	5.82	A9	Podgrodzie
	3.78	2.6	9.93	6.84	A10	Podgrodzie
	4.06	2.37	10.25	6.79	A11	Podgrodzie
	4.23	2.23	10.8	7.56	A12	Podgrodzie
	4.05	2.29	9.95	6.5	A13	Podgrodzie
	4.27	2.48	10.86	7.86	A14	Podgrodzie
	4.02	2	10.26	6.69	A15	Podgrodzie
	3.91	2.13	9.5	5.91	A16	Podgrodzie
	4.12	2.43	10.57	7.67	A17	Podgrodzie
	4.52	2.56	11.56	8.15	A18	Podgrodzie
	3.94	2.09	8.63	4.75	A19	Podgrodzie
	3.92	2.17	9.61	6.21	A20	Podgrodzie
	3.7	2.19	9.14	5.78	A21	Podgrodzie
	3.5	2.25	8.92	5.25	A22	Podgrodzie
	3.94	2.42	9.94	6.75	A23	Podgrodzie
	3.86	2.32	9.63	5.99	A24	Podgrodzie
	4.64	2.68	11.94	9.53	A25	Podgrodzie
	4.46	1.97	10.47	6.45	A26	Podgrodzie
	3.78	2.01	9.42	5.75	A27	Podgrodzie
	3.69	1.83	9.07	5.13	A28	Podgrodzie
	4.04	1.8	9.71	5.47	A29	Podgrodzie
	3.61	2.15	9.08	5.5	B1	Lublin
	4.48	2.28	10.56	6.96	B2	Lublin
	4.26	2.48	10.85	7.69	B3	Lublin
	3.83	1.92	9.09	5.53	B4	Lublin
	4.26	2.33	10.24	6.8	B5	Lublin
	4.14	1.44	9.42	5.14	B6	Lublin
	4.02	2.61	10.78	7.68	B7	Lublin
	4.03	2.41	10.24	7.27	B8	Lublin
	4.48	2.49	10.86	7.65	B9	Lublin
	3.59	1.66	8.77	4.38	B10	Lublin
	4.32	2.42	10.82	7.63	B11	Lublin
	3.58	2.1	9.24	5.46	B12	Lublin
	4.2	2.34	10.98	6.51	B14	Lublin
	3.27	1.43	7.27	3.07	B15	Lublin
	3.92	1.82	9.14	5.16	B16	Lublin
	3.51	2.06	8.75	5.17	B17	Lublin
	3.22	1.25	7.88	3.1	B18	Lublin
	3.83	1.91	9.66	5.77	B19	Lublin
	4.36	2.44	10.6	7.01	B20	Lublin
	3.85	1.9	9.56	5.79	B21	Lublin
	4.09	2.04	9.62	5.98	B22	Lublin
	3.6	2.26	9.74	6.7	B23	Lublin
	3.47	1.74	8.8	4.56	B24	Lublin
	4.5	2.72	10.64	7.14	C1	Unin
	4.7	2.35	11.42	8.26	C2	Unin
	4.36	2.8	11.29	8.94	C3	Unin
	4.32	2.69	10.81	7.49	C4	Unin
	3.92	2.51	10.25	7.12	C5	Unin
	4.48	2.5	10.62	7.29	C6	Unin
	4.35	2.6	11.01	8.13	C7	Unin
	3.76	2.04	9.57	5.53	C8	Unin
	3.82	2.56	10.03	6.93	C9	Unin
	4.37	2.18	10.52	6.91	C10	Unin
	4.44	2.37	10.61	7.12	C11	Unin
	4.31	2.69	11.42	8.48	C12	Unin
	3.74	3	10.82	8.7	C13	Unin
	4.05	2.51	10.04	6.99	C14	Unin
	4.33	2.56	10.79	7.64	C15	Unin
	3.76	1.98	9.13	5.3	C16	Unin
	4.35	2.42	10.03	6.61	C17	Unin
	4.63	2.38	11.36	9.1	C18	Unin
	4.1	1.87	9.62	5.01	C19	Unin
	4.01	1.84	9.63	5.34	C20	Unin
	4.19	2.05	10.46	6.69	C21	Unin
	3.68	2.29	10.2	7.36	C22	Unin
	4.27	1.99	9.98	6.2	C23	Unin
	4.44	2.31	11.47	8.75	C24	Unin
	4.28	1.92	10.45	6.1	C25	Unin
	4.67	2.68	11.7	8.53	C26	Unin
	4.25	1.78	9.91	5.35	C27	Unin
	4.15	2.7	11.02	8.4	D1	Czarnocin
	3.87	2.43	10.17	6.9	D2	Czarnocin
	4.11	2.69	10.78	8.13	D3	Czarnocin
	4.39	2.63	10.94	8.25	D4	Czarnocin
	4.18	2.28	9.97	6.41	D5	Czarnocin
	4.18	2.83	11	8.57	D6	Czarnocin
	4.75	2.5	11.71	8.53	D7	Czarnocin
	4.32	2.38	10.44	7.12	D8	Czarnocin
	4.02	2.56	10.65	7.66	D9	Czarnocin
	4.19	2.71	11.64	9.7	D10	Czarnocin
	3.97	2.45	10.17	7.16	D11	Czarnocin
	4.18	2.51	10.55	7.47	D12	Czarnocin
	3.81	2.77	10.01	7	D13	Czarnocin
	4.51	2.47	11	7.78	D14	Czarnocin
	3.9	2.67	10	7.21	D15	Czarnocin
	3.62	2.34	9.71	6.58	D16	Czarnocin
	3.89	2.19	9.35	5.84	D17	Czarnocin
	4.05	2.38	11.1	7.18	D18	Czarnocin
	4.14	2.65	10.43	7.52	D19	Czarnocin
	3.83	2.46	10.42	7.25	D20	Czarnocin
	4.06	2.48	10.26	7.5	D21	Czarnocin
	4.55	2.65	11.68	9.84	D22	Czarnocin
	4.32	2.71	10.6	7.69	D23	Czarnocin
	4.72	2.94	12.07	10.23	D24	Czarnocin
	4.19	2.54	10.88	7.96	D25	Czarnocin
	3.79	2.71	10.78	8.5	D26	Czarnocin
	4.48	2.73	11.53	9.02	D27	Czarnocin
	3.69	2.67	9.86	7.12	D28	Czarnocin
	3.91	2.49	10.08	6.97	D29	Czarnocin
	3.59	2.14	9.41	5.83	D30	Czarnocin
	4.51	3.14	12.06	10.34	E1	Swieta
	4.38	2.89	11.53	9.38	E2	Swieta
	4.45	2.53	11.21	8.39	E3	Swieta
	4.43	3.14	11.87	9.91	E4	Swieta
	4.11	2.42	10.8	7.57	E5	Swieta
	4.91	3.33	12.97	12.16	E6	Swieta
	4.88	2.52	12.22	9.39	E7	Swieta
	4.37	2.67	11.34	8.4	E8	Swieta
	4.43	2.4	11.01	7.87	E9	Swieta
	5.26	2.8	13.27	11.22	E10	Swieta
	4.64	2.67	11.34	8.18	E11	Swieta
	4.07	2.27	9.77	6.44	E12	Swieta
	5.1	2.4	12.07	9.09	E13	Swieta
	4.25	2.37	10.01	6.56	E14	Swieta
	4.11	2.19	10.4	7.21	E15	Swieta
	4.32	2.29	10.11	6.65	E16	Swieta
	4.12	2.3	10.79	7.74	E17	Swieta
	3.85	2.41	9.98	6.64	E18	Swieta
	4.23	2.61	10.79	7.68	E19	Swieta
	4.21	2.19	9.84	6.15	E20	Swieta
	4.52	2.62	11.31	8.21	E21	Swieta
	4.57	2.21	10.75	7.1	E22	Swieta
	4.64	2.51	11.59	9.25	E23	Swieta
	4.55	2.76	11.17	8.49	E24	Swieta
	4.43	3.08	11.62	9.9	E25	Swieta
	4.35	2.7	11.25	8.68	E26	Swieta
	4.74	2.71	11.53	8.71	E27	Swieta
	4.43	2.45	10.81	7.61	F1	Szczecin-Zdroje
	3.74	2.2	9.65	6.32	F2	Szczecin-Zdroje
	3.57	1.99	8.61	5.03	F3	Szczecin-Zdroje
	3.71	2.05	9.84	6.11	F4	Szczecin-Zdroje
	4.24	1.9	10.05	6	F5	Szczecin-Zdroje
	4.49	2.47	11.38	7.33	F6	Szczecin-Zdroje
	3.75	2.42	10.02	6.81	F7	Szczecin-Zdroje
	4.37	2.52	10.63	7.74	F8	Szczecin-Zdroje
	4.73	2.57	11.57	8.78	F9	Szczecin-Zdroje
	4.71	2.79	11.7	9	F10	Szczecin-Zdroje
	4.33	2.36	10.73	7.29	F11	Szczecin-Zdroje
	4.55	2.99	11.59	8.85	F12	Szczecin-Zdroje
	4.53	2.87	12.1	10.21	F13	Szczecin-Zdroje
	3.76	2.6	10.34	7.33	F14	Szczecin-Zdroje
	3.69	1.96	9.09	4.97	F15	Szczecin-Zdroje
	4.15	2.44	10.47	7.46	F16	Szczecin-Zdroje
	3.98	2.6	10.52	7.4	F17	Szczecin-Zdroje
	4.45	2.64	10.85	7.65	F18	Szczecin-Zdroje
	3.43	1.89	8.61	4.82	F19	Szczecin-Zdroje
	3.69	2.42	10.36	6.73	F20	Szczecin-Zdroje
	3.77	1.88	9.2	5.53	F21	Szczecin-Zdroje
	4.51	2.36	11.08	8.07	F22	Szczecin-Zdroje
	4.43	2.63	11.05	8.27	F23	Szczecin-Zdroje
	4.63	2.1	10.4	6.47	F24	Szczecin-Zdroje
	4.3	2.52	11.05	7.38	F25	Szczecin-Zdroje
	4.71	1.99	11.15	7.45	F26	Szczecin-Zdroje
	4.56	2.85	11.3	8.76	F27	Szczecin-Zdroje
	3.71	2.6	10.14	7.23	F28	Szczecin-Zdroje
	4.03	2.54	9.86	7.01	F29	Szczecin-Zdroje
	3.88	2.67	10.17	7.38	G1	Police
	4.73	2.98	12.15	10.15	G2	Police
	4.85	2.99	12.23	10.3	G3	Police
	4.99	3.01	12.2	10.17	G4	Police
	4.8	2.88	11.34	8.3	G5	Police
	4.41	2.3	10.8	7.32	G6	Police
	4.11	2.39	10.52	7	G7	Police
	4.62	2.46	10.44	6.74	G8	Police
	4.3	2.15	10.36	9.84	G9	Police
	4.88	3.14	12.59	11.08	G10	Police
	4.47	2.54	11.47	8.79	G11	Police
	4.62	3.08	12.6	11.07	G12	Police
	4.46	2.59	11.35	8.83	G13	Police
	4.79	2.93	12.62	11.02	G14	Police
	4.36	2.32	10.63	7.8	G15	Police
	4.5	2.66	11.62	9.12	G16	Police
	4.47	2.94	12.36	10.35	G17	Police
	4.58	2.4	11.21	8.33	G18	Police
	4.01	2.52	10.34	7.42	G19	Police
	4.63	3.05	12.15	9.76	G20	Police
	5.24	2.32	11.96	8.79	G21	Police
	4.13	2.56	10.27	7.11	G22	Police
	4.07	2.51	10.83	7.91	G23	Police
	5.74	3.21	14.59	13.54	G24	Police
	4.77	2.94	11.92	10.12	G25	Police
	4.42	3.04	11.89	9.71	G26	Police
	4.96	2.76	13.29	11.58	G27	Police
	5.09	2.62	12.34	9.65	G28	Police
	4.32	2.18	10.31	6.48	H1	Brzozki
	4.72	2.2	11.27	8.04	H2	Brzozki
	4.1	2.19	9.92	6.28	H3	Brzozki
	4.36	2.83	11.1	8.1	H4	Brzozki
	4.38	2.34	10.77	7.25	H5	Brzozki
	4.26	1.77	10.18	5.69	H6	Brzozki
	4.44	2.21	10.4	6.67	H7	Brzozki
	4.21	1.71	10.31	5.75	H8	Brzozki
	4.46	1.77	10.93	6.99	H9	Brzozki
	4.17	2.32	10.46	7.06	H10	Brzozki
	4.26	2.16	10.72	7.24	H11	Brzozki
	4.23	2.21	10.81	6.84	H12	Brzozki
	4.81	2.4	12.02	9.61	H13	Brzozki
	3.59	1.94	8.9	5.27	H14	Brzozki
	4.73	2.7	11.86	9.25	H15	Brzozki
	4.53	2.01	10.81	6.91	H16	Brzozki
	4.12	1.86	9.73	5.88	H17	Brzozki
	4.68	2.33	11.59	8.72	H18	Brzozki
	4.82	2.93	11.49	8.26	H19	Brzozki
	4.62	2.19	10.95	7.53	H20	Brzozki
	4.75	2.66	11.59	8.83	H21	Brzozki
	4.75	1.87	10.22	5.94	H22	Brzozki
	4.32	2.31	10.75	7.23	H23	Brzozki
	4.17	2.1	10.11	6.61	H24	Brzozki
	4.07	2.23	10.2	7.03	H25	Brzozki
	4.58	2.44	11.2	7.46	H26	Brzozki
	4.48	2.49	11.2	8.39	H27	Brzozki
	4.49	1.98	10.55	6.66	H28	Brzozki
	4.43	2.35	11.15	8.15	H29	Brzozki
	4.49	2.21	10.88	7.29	H30	Brzozki
